# Supplementary material
Source: ML conference proceedings conference paper supplement (https://proceedings.mlr.press/v108/pillaud-vivien20a.html)
Supplement: Supplementary file 1 [file pillaud-vivien20a-supp.pdf]

# Appendix

The Appendix is organized as follows. In Section [A](#) we prove Propositions [1](#) and [2](#). Section [B](#) is devoted to the analysis of the bias. We study spectral properties of the diffusion operator  $L$  to give sufficient and general conditions for the compactness assumption from Theorem [2](#) and Proposition [3](#) to hold. Section [C](#) provides concentration inequalities for the operators involved in Proposition [2](#). We conclude by Section [D](#) that gives explicit rates of convergence for the bias when  $\mu$  is a 1-D Gaussian (this result could be easily extended to higher dimensional Gaussians).

## A Proofs of Proposition [1](#) and [2](#)

Recall that  $L_0^2(\mu)$  is the subspace of  $L^2(\mu)$  of zero mean functions:  $L_0^2(\mu) := \{f \in L^2(\mu), \int f(x)d\mu(x) = 0\}$  and that we similarly defined  $\mathcal{H}_0 := \mathcal{H} \cap L_0^2(\mu)$ . Let us also denote by  $\mathbb{R}\mathbb{1}$ , the set of constant functions.

*Proof of Proposition [1](#).* The proof is simply the following reformulation of Equation [\(1\)](#). Under assumption **(Ass. [1](#))**:

$$\begin{aligned} \mathcal{P}_\mu &= \sup_{f \in H^1(\mu) \setminus \mathbb{R}\mathbb{1}} \frac{\int_{\mathbb{R}^d} f(x)^2 d\mu(x) - \left(\int_{\mathbb{R}^d} f(x) d\mu(x)\right)^2}{\int_{\mathbb{R}^d} \|\nabla f(x)\|^2 d\mu(x)} \\ &= \sup_{f \in \mathcal{H} \setminus \mathbb{R}\mathbb{1}} \frac{\int_{\mathbb{R}^d} f(x)^2 d\mu(x) - \left(\int_{\mathbb{R}^d} f(x) d\mu(x)\right)^2}{\int_{\mathbb{R}^d} \|\nabla f(x)\|^2 d\mu(x)} \\ &= \sup_{f \in \mathcal{H}_0 \setminus \{0\}} \frac{\int_{\mathbb{R}^d} f(x)^2 d\mu(x) - \left(\int_{\mathbb{R}^d} f(x) d\mu(x)\right)^2}{\int_{\mathbb{R}^d} \|\nabla f(x)\|^2 d\mu(x)}. \end{aligned}$$

We then simply note that

$$\left(\int_{\mathbb{R}^d} f(x) d\mu(x)\right)^2 = \left(\left\langle f, \int_{\mathbb{R}^d} K_x d\mu(x) \right\rangle_{\mathcal{H}}\right)^2 = \langle f, m \rangle_{\mathcal{H}}^2 = \langle f, (m \otimes m)f \rangle_{\mathcal{H}}.$$

Similarly,

$$\int_{\mathbb{R}^d} f(x)^2 d\mu(x) = \langle f, \Sigma f \rangle_{\mathcal{H}} \quad \text{and} \quad \int_{\mathbb{R}^d} \|\nabla f(x)\|^2 d\mu(x) = \langle f, \Delta f \rangle_{\mathcal{H}}.$$

Note here that  $\text{Ker}(\Delta) \subset \text{Ker}(C)$ . Indeed, if  $f \in \text{Ker}(\Delta)$ , then  $\langle f, \Delta f \rangle_{\mathcal{H}} = 0$ . Hence,  $\mu$ -almost everywhere,  $\nabla f = 0$  so that  $f$  is constant and  $Cf = 0$ . Note also the previous reasoning shows that  $\text{Ker}(\Delta)$  is the subset of  $\mathcal{H}$  made of constant functions, and  $(\text{Ker}(\Delta))^\perp = \mathcal{H} \cap L_0^2(\mu) = \mathcal{H}_0$ .

Thus we can write,

$$\mathcal{P}_\mu = \sup_{f \in \mathcal{H} \setminus \text{Ker}(\Delta)} \frac{\langle f, (\Sigma - m \otimes m)f \rangle_{\mathcal{H}}}{\langle f, \Delta f \rangle_{\mathcal{H}}} = \left\| \Delta^{-1/2} C \Delta^{-1/2} \right\|,$$

where we consider  $\Delta^{-1}$  as the inverse of  $\Delta$  restricted to  $(\text{Ker}(\Delta))^\perp$  and thus get Proposition [1](#).  $\square$

*Proof of Proposition [2](#).* We refer to Lemmas [5](#) and [6](#) in Section [C](#) for the explicit bounds. We have the following inequalities:

$$\begin{aligned} \left| \widehat{\mathcal{P}}_\mu - \mathcal{P}_\mu^\lambda \right| &= \left| \left\| \widehat{\Delta}_\lambda^{-1/2} \widehat{C} \widehat{\Delta}_\lambda^{-1/2} \right\| - \left\| \Delta_\lambda^{-1/2} C \Delta_\lambda^{-1/2} \right\| \right| \\ &\leq \left| \left\| \widehat{\Delta}_\lambda^{-1/2} \widehat{C} \widehat{\Delta}_\lambda^{-1/2} \right\| - \left\| \widehat{\Delta}_\lambda^{-1/2} C \widehat{\Delta}_\lambda^{-1/2} \right\| \right| + \left| \left\| \widehat{\Delta}_\lambda^{-1/2} C \widehat{\Delta}_\lambda^{-1/2} \right\| - \left\| \Delta_\lambda^{-1/2} C \Delta_\lambda^{-1/2} \right\| \right| \\ &\leq \left\| \widehat{\Delta}_\lambda^{-1/2} (\widehat{C} - C) \widehat{\Delta}_\lambda^{-1/2} \right\| + \left\| C^{1/2} \widehat{\Delta}_\lambda^{-1} C^{1/2} \right\| - \left\| C^{1/2} \Delta_\lambda^{-1} C^{1/2} \right\| \\ &\leq \left\| \widehat{\Delta}_\lambda^{-1/2} (\widehat{C} - C) \widehat{\Delta}_\lambda^{-1/2} \right\| + \left\| C^{1/2} (\widehat{\Delta}_\lambda^{-1} - \Delta_\lambda^{-1}) C^{1/2} \right\|. \end{aligned}$$

Consider an event where the estimates of Lemmas 5, 6 and 7 hold for a given value of  $\delta > 0$ . A simple computation shows that this event has a probability  $1 - 3\delta$  at least. We study the two terms above separately. First, provided that  $n \geq 15\mathcal{F}_\infty(\lambda) \log \frac{4\text{Tr}\Delta}{\lambda\delta}$  and  $\lambda \in (0, \|\Delta\|]$  in order to use Lemmas 6 and 7,

$$\begin{aligned} \left\| \widehat{\Delta}_\lambda^{-1/2} (\widehat{C} - C) \widehat{\Delta}_\lambda^{-1/2} \right\| &= \left\| \widehat{\Delta}_\lambda^{-1/2} \Delta_\lambda^{1/2} \Delta_\lambda^{-1/2} (\widehat{C} - C) \Delta_\lambda^{-1/2} \Delta_\lambda^{1/2} \widehat{\Delta}_\lambda^{-1/2} \right\| \\ &\leq \underbrace{\left\| \widehat{\Delta}_\lambda^{-1/2} \Delta_\lambda^{1/2} \right\|^2}_{\text{Lemma 7}} \underbrace{\left\| \Delta_\lambda^{-1/2} (\widehat{C} - C) \Delta_\lambda^{-1/2} \right\|}_{\text{Lemma 5}} \\ &\leq 2 (\text{Lemma 5}). \end{aligned}$$

For the second term,

$$\begin{aligned} \left\| C^{1/2} (\widehat{\Delta}_\lambda^{-1} - \Delta_\lambda^{-1}) C^{1/2} \right\| &= \left\| C^{1/2} \widehat{\Delta}_\lambda^{-1} (\Delta - \widehat{\Delta}) \Delta_\lambda^{-1} C^{1/2} \right\| \\ &= \left\| C^{1/2} \Delta_\lambda^{-1/2} \Delta_\lambda^{1/2} \widehat{\Delta}_\lambda^{-1} \Delta_\lambda^{1/2} \Delta_\lambda^{-1/2} (\Delta - \widehat{\Delta}) \Delta_\lambda^{-1/2} \Delta_\lambda^{1/2} C^{1/2} \right\| \\ &\leq \underbrace{\left\| \widehat{\Delta}_\lambda^{-1/2} \Delta_\lambda^{1/2} \right\|^2}_{\text{Lemma 7}} \underbrace{\left\| C^{1/2} \Delta_\lambda^{-1/2} \right\|^2}_{\mathcal{P}_\mu^\lambda} \underbrace{\left\| \Delta_\lambda^{-1/2} (\Delta - \widehat{\Delta}) \Delta_\lambda^{-1/2} \right\|}_{\text{Lemma 6}} \\ &\leq 2 \cdot \mathcal{P}_\mu^\lambda \cdot (\text{Lemma 6}). \end{aligned}$$

The leading order term in the estimate of Lemma 6 is of order  $\left( \frac{2\mathcal{K}_d \log(4\text{Tr}\Delta/\lambda\delta)}{\lambda n} \right)^{1/2}$  whereas the leading one in Lemma 5 is of order  $\frac{8\mathcal{K} \log(2/\delta)}{\lambda \sqrt{n}}$ . Hence, the latter is the dominant term in the final estimation.  $\square$

## B Analysis of the bias: convergence of the regularized Poincaré constant to the true one

We begin this section by proving Proposition 3. We then investigate the compactness condition required in the assumptions of Proposition 3 by studying the spectral properties of the diffusion operator  $L$ . In Proposition 6 we derive, under some general assumption on the RKHS and usual growth conditions on  $V$ , some convergence rate for the bias term.

### B.1 General condition for consistency: proof of Proposition 3

To prove Proposition 3, we first need a general result on operator norm convergence.

**Lemma 1.** *Let  $\mathcal{H}$  be a Hilbert space and suppose that  $(A_n)_{n \geq 0}$  is a family of bounded operators such that  $\forall n \in \mathbb{N}$ ,  $\|A_n\| \leq 1$  and  $\forall f \in \mathcal{H}$ ,  $A_n f \xrightarrow{n \rightarrow \infty} A f$ . Suppose also that  $B$  is a compact operator. Then, in operator norm,*

$$A_n B A_n^* \xrightarrow{n \rightarrow \infty} A B A^*.$$

*Proof.* Let  $\varepsilon > 0$ . As  $B$  is compact, it can be approximated by a finite rank operator  $B_{n_\varepsilon} = \sum_{i=1}^{n_\varepsilon} b_i \langle f_i, \cdot \rangle g_i$ , where  $(f_i)_i$  and  $(g_i)_i$  are orthonormal bases, and  $(b_i)_i$  is a sequence of nonnegative numbers with limit zero (singular values of the operator). More precisely,  $n_\varepsilon$  is chosen so that

$$\|B - B_{n_\varepsilon}\| \leq \frac{\varepsilon}{2}.$$

Moreover,  $\varepsilon$  being fixed,  $A_n B_{n_\varepsilon} A_n^* = \sum_{i=1}^{n_\varepsilon} b_i \langle A_n f_i, \cdot \rangle A_n g_i \xrightarrow{n \rightarrow \infty} \sum_{i=1}^{n_\varepsilon} b_i \langle A f_i, \cdot \rangle A g_i = A B_{n_\varepsilon} A^*$  in operator norm, so that, for  $n \geq N_\varepsilon$ , with  $N_\varepsilon \geq n_\varepsilon$  sufficiently large,  $\|A_n B_{n_\varepsilon} A_n^* - A B_{n_\varepsilon} A^*\| \leq \frac{\varepsilon}{2}$ . Finally, as  $\|A\| \leq 1$ , it holds, for  $n \geq N_\varepsilon$

$$\begin{aligned} \|A_n B_{n_\varepsilon} A_n^* - A B A^*\| &\leq \|A_n B_{n_\varepsilon} A_n^* - A B_{n_\varepsilon} A^*\| + \|A(B_{n_\varepsilon} - B)A^*\| \\ &\leq \|A_n B_{n_\varepsilon} A_n^* - A B_{n_\varepsilon} A^*\| + \|B_{n_\varepsilon} - B\| \leq \varepsilon. \end{aligned}$$

This proves the convergence in operator norm of  $A_n B A_n^*$  to  $A B A^*$  when  $n$  goes to infinity.  $\square$

We can now prove Proposition 3.

*Proof of Proposition 3.* Let  $\lambda > 0$ , we want to show that

$$\mathcal{P}_\mu^\lambda = \|\Delta_\lambda^{-1/2} C \Delta_\lambda^{-1/2}\| \xrightarrow{\lambda \rightarrow 0} \|\Delta^{-1/2} C \Delta^{-1/2}\| = \mathcal{P}_\mu.$$

Actually, with Lemma 1, we will show a stronger result which is the norm convergence of the operator  $\Delta_\lambda^{-1/2} C \Delta_\lambda^{-1/2}$  to  $\Delta^{-1/2} C \Delta^{-1/2}$ . Indeed, denoting by  $B = \Delta^{-1/2} C \Delta^{-1/2}$  and by  $A_\lambda = \Delta_\lambda^{-1/2} \Delta^{1/2}$  both defined on  $\mathcal{H}_0$ , we have  $\Delta_\lambda^{-1/2} C \Delta_\lambda^{-1/2} = A_\lambda B A_\lambda^*$  with  $B$  compact and  $\|A_\lambda\| \leq 1$ . Furthermore, let  $(\phi_i)_{i \in \mathbb{N}}$  be an orthonormal family of eigenvectors of the compact operator  $\Delta$  associated to eigenvalues  $(\nu_i)_{i \in \mathbb{N}}$ . Then we can write, for any  $f \in \mathcal{H}_0$ ,

$$A_\lambda f = \Delta_\lambda^{-1/2} \Delta^{1/2} f = \sum_{i=0}^{\infty} \sqrt{\frac{\nu_i}{\lambda + \nu_i}} \langle f, \phi_i \rangle_{\mathcal{H}} \phi_i \xrightarrow{\lambda \rightarrow 0} f.$$

Hence by applying Lemma 1, we have the convergence in operator norm of  $\Delta_\lambda^{-1/2} C \Delta_\lambda^{-1/2}$  to  $\Delta^{-1/2} C \Delta^{-1/2}$ , hence in particular the convergence of the norms of the operators.  $\square$

## B.2 Introduction of the operator $L$

In all this section we focus on a distribution  $d\mu$  of the form  $d\mu(x) = e^{-V(x)} dx$ .

Let us give first a characterization of the function that allows to recover the Poincaré constant, i.e., the function in  $H^1(\mu)$  that minimizes  $\frac{\int_{\mathbb{R}^d} \|\nabla f(x)\|^2 d\mu(x)}{\int_{\mathbb{R}^d} f(x)^2 d\mu(x) - (\int_{\mathbb{R}^d} f(x) d\mu(x))^2}$ . We call  $f_*$  this function. We recall that we denote by  $\Delta^L$  the standard Laplacian in  $\mathbb{R}^d$ :  $\forall f \in H^1(\mu)$ ,  $\Delta^L f = \sum_{i=1}^d \frac{\partial^2 f_i}{\partial^2 x_i}$ . Let us define the operator  $\forall f \in H^1(\mu)$ ,  $Lf = -\Delta^L f + \langle \nabla V, \nabla f \rangle$ , which is the opposite of the infinitesimal generator of the dynamics (3). We can verify that it is symmetric in  $L^2(\mu)$ . Indeed by integrations by parts for any  $f, g \in C_c^\infty$ ,

$$\begin{aligned} \langle Lf, g \rangle_{L^2(\mu)} &= \int (Lf)(x) g(x) d\mu(x) \\ &= - \int \Delta^L f(x) g(x) e^{-V(x)} dx + \int \langle \nabla V(x), \nabla f(x) \rangle g(x) e^{-V(x)} dx \\ &= \int \langle \nabla f(x), \nabla (g(x) e^{-V(x)}) \rangle dx + \int \langle \nabla V(x), \nabla f(x) \rangle g(x) e^{-V(x)} dx \\ &= \int \langle \nabla f(x), \nabla g(x) \rangle e^{-V(x)} dx - \int \langle \nabla f(x), \nabla V(x) \rangle g(x) e^{-V(x)} dx \\ &\quad + \int \langle \nabla V(x), \nabla f(x) \rangle g(x) e^{-V(x)} dx \\ &= \int \langle \nabla f(x), \nabla g(x) \rangle d\mu(x). \end{aligned}$$

The last equality being totally symmetric in  $f$  and  $g$ , we have the symmetry of the operator  $L$ :  $\langle Lf, g \rangle_{L^2(\mu)} = \int \langle \nabla f, \nabla g \rangle d\mu = \langle f, Lg \rangle_{L^2(\mu)}$  (for the self-adjointness we refer to [Bakry et al., 2014]). Remark that the same calculation shows that  $\nabla^* = -\text{div} + \nabla V \cdot$ , hence  $L = \nabla^* \cdot \nabla = -\Delta^L + \langle \nabla V, \nabla \cdot \rangle$ , where  $\nabla^*$  is the adjoint of  $\nabla$  in  $L^2(\mu)$ .

Let us call  $\pi$  the orthogonal projector of  $L^2(\mu)$  on constant functions:  $\pi f : x \in \mathbb{R}^d \mapsto \int f d\mu$ . The problem (4) then rewrites:

$$\mathcal{P}^{-1} = \inf_{f \in (H^1(\mu) \cap L_0^2(\mu)) \setminus \{0\}} \frac{\langle Lf, f \rangle_{L^2(\mu)}}{\|(I_{L^2(\mu)} - \pi)f\|^2}, \quad (8)$$

Until the end of this part, to alleviate the notation we omit to mention that the scalar product is the canonical one on  $L^2(\mu)$ . In the same way, we also denote  $\mathbf{1} = I_{L^2(\mu)}$ .

### B.2.1 Case where $d\mu$ has infinite support

**Proposition 4** (Properties of the minimizer). *If  $\lim_{|x| \rightarrow \infty} \frac{1}{4} |\nabla V|^2 - \frac{1}{2} \Delta^L V = +\infty$ , the problem (8) admits a minimizer in  $H^1(\mu)$  and every minimizer  $f$  is an eigenvector of  $L$  associated with the eigenvalue  $\mathcal{P}^{-1}$ :*

$$Lf = \mathcal{P}^{-1} f. \quad (9)$$

To prove the existence of a minimizer in  $H^1(\mu)$ , we need the following lemmas.

**Lemma 2** (Criterion for compact embedding of  $H^1(\mu)$  in  $L^2(\mu)$ ). *The injection  $H^1(\mu) \hookrightarrow L^2(\mu)$  is compact if and only if the Schrödinger operator  $-\Delta^L + \frac{1}{4} |\nabla V|^2 - \frac{1}{2} \Delta^L V$  has compact resolvent.*

*Proof.* See [Gansberger, 2010, Proposition 1.3] or [Reed and Simon, 2012, Lemma XIII.65].  $\square$

**Lemma 3** (A sufficient condition). *If  $\Phi \in C^\infty$  and  $\Phi(x) \rightarrow +\infty$  when  $|x| \rightarrow \infty$ , the Schrödinger operator  $-\Delta^L + \Phi$  on  $\mathbb{R}^d$  has compact resolvent.*

*Proof.* See [Helffer and Nier, 2005, Section 3] or [Reed and Simon, 2012, Lemma XIII.67].  $\square$

Now we can prove Proposition 4

*Proof of Proposition 4.* We first prove that (8) admits a minimizer in  $H^1(\mu)$ . Indeed, we have,

$$\mathcal{P}^{-1} = \inf_{f \in (H^1 \cap L_0^2) \setminus \{0\}} \frac{\langle Lf, f \rangle_{L^2(\mu)}}{\|(\mathbb{1} - \pi)f\|^2} = \inf_{f \in (H^1 \cap L_0^2) \setminus \{0\}} J(f), \quad \text{where } J(f) := \frac{\|\nabla f\|^2}{\|f\|^2}.$$

Let  $(f_n)_{n \geq 0}$  be a sequence of functions in  $H_0^1(\mu)$  equipped with the natural  $H^1$ -norm such that  $(J(f_n))_{n \geq 0}$  converges to  $\mathcal{P}^{-1}$ . As the problem is invariant by rescaling of  $f$ , we can assume that  $\forall n \geq 0$ ,  $\|f_n\|_{L^2(\mu)}^2 = 1$ . Hence  $J(f_n) = \|\nabla f_n\|_{L^2(\mu)}^2$  converges (to  $\mathcal{P}^{-1}$ ). In particular  $\|\nabla f_n\|_{L^2(\mu)}^2$  is bounded in  $L^2(\mu)$ , hence  $(f_n)_{n \geq 0}$  is bounded in  $H^1(\mu)$ . Since by Lemma 2 and 3 we have a compact injection of  $H^1(\mu)$  in  $L^2(\mu)$ , it holds, upon extracting a subsequence, that there exists  $f \in H^1(\mu)$  such that

$$\begin{cases} f_n \rightarrow f & \text{strongly in } L^2(\mu) \\ f_n \rightharpoonup f & \text{weakly in } H^1(\mu). \end{cases}$$

Thanks to the strong  $L^2(\mu)$  convergence,  $\|f\|^2 = \lim_{n \rightarrow \infty} \|f_n\|^2 = 1$ . By the Cauchy-Schwarz inequality and then taking the limit  $n \rightarrow +\infty$ ,

$$\|\nabla f\|^2 = \lim_{n \rightarrow \infty} \langle \nabla f_n, \nabla f \rangle \leq \lim_{n \rightarrow \infty} \|\nabla f\| \|\nabla f_n\| = \|\nabla f\| \mathcal{P}^{-1}.$$

Therefore,  $\|\nabla f\| \leq \mathcal{P}^{-1/2}$  which implies that  $J(f) \leq \mathcal{P}^{-1}$ , and so  $J(f) = \mathcal{P}^{-1}$ . This shows that  $f$  is a minimizer of  $J$ .

Let us next prove the PDE characterization of minimizers. A necessary condition on a minimizer  $f_*$  of the problem  $\inf_{f \in H^1(\mu)} \{\|\nabla f\|_{L^2(\mu)}, \|f\|^2 = 1\}$  is to satisfy the following Euler-Lagrange equation: there exists  $\beta \in \mathbb{R}$  such that:

$$Lf_* + \beta f_* = 0.$$

Plugging this into (8), we have:  $\mathcal{P}^{-1} = \langle Lf_*, f_* \rangle = -\beta \langle f_*, f_* \rangle = -\beta \|f_*\|_2^2 = -\beta$ . Finally, the equation satisfied by  $f_*$  is:

$$Lf = -\Delta^L f_* + \langle \nabla V, \nabla f_* \rangle = \mathcal{P}^{-1} f_*,$$

which concludes the proof.  $\square$

### B.2.2 Case where $d\mu$ has compact support

We suppose in this section that  $d\mu$  has a compact support included in  $\Omega$ . Without loss of generality we can take a set  $\Omega$  with a  $C^\infty$  smooth boundary  $\partial\Omega$ . In this case, without changing the result of the variational problem, we can restrict ourselves to functions that vanish at the boundary, namely the Sobolev space  $H_D^1(\mathbb{R}^d, d\mu) = \{f \in H^1(\mu) \text{ s.t. } f|_{\partial\Omega} = 0\}$ . Note that, as  $V$  is smooth,  $H^1(\mu) \supset H^1(\mathbb{R}^d, d\lambda)$  the usual "flat" space equipped with  $d\lambda$ , the Lebesgue measure. Note also that only in this section the domain of the operator  $L$  is  $H^2 \cap H_D^1$ .

**Proposition 5** (Properties of the minimizer in the compact support case). *The problem (8) admits a minimizer in  $H_D^1$  and every minimizer  $f$  satisfies the partial differential equation:*

$$Lf = \mathcal{P}^{-1}f. \quad (10)$$

*Proof.* The proof is exactly the same than the one of Proposition 4 since  $H_D^1$  can be compactly injected in  $L^2$  without any additional assumption on  $V$ .  $\square$

Let us take in this section  $\mathcal{H} = H^d(\mathbb{R}^d, d\lambda)$ , which is the RKHS associated to the kernel  $k(x, x') = e^{-\|x-x'\|}$ . As  $f_*$  satisfies (10), from regularity properties of elliptic PDEs, we infer that  $f_*$  is  $C^\infty(\overline{\Omega})$ . By the Whitney extension theorem [Whitney, 1934], we can extend  $f_*$  defined on  $\overline{\Omega}$  to a smooth and compactly supported function in  $\Omega' \supset \Omega$  of  $\mathbb{R}^d$ . Hence  $f_* \in C_c^\infty(\mathbb{R}^d) \subset \mathcal{H}$ .

**Proposition 6.** *Consider a minimizer  $f_*$  of (8). Then*

$$\mathcal{P}^{-1} \leq \mathcal{P}_\lambda^{-1} \leq \mathcal{P}^{-1} + \lambda \frac{\|f_*\|_{\mathcal{H}}^2}{\|f_*\|_{L^2(\mu)}^2}. \quad (11)$$

*Proof.* First note that  $f_*$  has mean zero with respect to  $d\mu$ . Indeed,  $\int f d\mu = \mathcal{P}^{-1} \int Lf d\mu = 0$ , by the fact that  $d\mu$  is the stationary distribution of the dynamics.

For  $\lambda > 0$ ,

$$\begin{aligned} \mathcal{P}^{-1} \leq \mathcal{P}_\lambda^{-1} &= \inf_{f \in \mathcal{H} \setminus \mathbb{R}\mathbb{1}} \frac{\int_{\mathbb{R}^d} \|\nabla f(x)\|^2 d\mu(x) + \lambda \|f\|_{\mathcal{H}}^2}{\left( \int_{\mathbb{R}^d} f(x)^2 d\mu(x) - \left( \int_{\mathbb{R}^d} f(x) d\mu(x) \right)^2 \right)} \\ &\leq \frac{\int_{\mathbb{R}^d} \|\nabla f_*(x)\|^2 d\mu(x) + \lambda \|f_*\|_{\mathcal{H}}^2}{\int_{\mathbb{R}^d} f_*(x)^2 d\mu(x)} = \mathcal{P}^{-1} + \lambda \frac{\|f_*\|_{\mathcal{H}}^2}{\|f_*\|_{L^2(\mu)}^2}, \end{aligned}$$

which provides the result.  $\square$

## C Technical inequalities

### C.1 Concentration inequalities

We first begin by recalling some concentration inequalities for sums of random vectors and operators.

**Proposition 7** (Bernstein's inequality for sums of random vectors). *Let  $z_1, \dots, z_n$  be a sequence of independent identically and distributed random elements of a separable Hilbert space  $\mathcal{H}$ . Assume that  $\mathbb{E}\|z_1\| < +\infty$  and note  $\mu = \mathbb{E}z_1$ . Let  $\sigma, L \geq 0$  such that,*

$$\forall p \geq 2, \quad \mathbb{E} \|z_1 - \mu\|_{\mathcal{H}}^p \leq \frac{1}{2} p! \sigma^2 L^{p-2}.$$

*Then, for any  $\delta \in (0, 1]$ ,*

$$\left\| \frac{1}{n} \sum_{i=1}^n z_i - \mu \right\|_{\mathcal{H}} \leq \frac{2L \log(2/\delta)}{n} + \sqrt{\frac{2\sigma^2 \log(2/\delta)}{n}}, \quad (12)$$

*with probability at least  $1 - \delta$ .*

*Proof.* This is a restatement of Theorem 3.3.4 of [Yurinsky, 1995].  $\square$

**Proposition 8** (Bernstein's inequality for sums of random operators). *Let  $\mathcal{H}$  be a separable Hilbert space and let  $X_1, \dots, X_n$  be a sequence of independent and identically distributed self-adjoint random operators on  $\mathcal{H}$ . Assume that  $\mathbb{E}(X_i) = 0$  and that there exist  $T > 0$  and  $S$  a positive trace-class operator such that  $\|X_i\| \leq T$  almost surely and  $\mathbb{E}X_i^2 \preceq S$  for any  $i \in \{1, \dots, n\}$ . Then, for any  $\delta \in (0, 1]$ , the following inequality holds:*

$$\left\| \frac{1}{n} \sum_{i=1}^n X_i \right\| \leq \frac{2T\beta}{3n} + \sqrt{\frac{2\|S\|\beta}{n}}, \quad (13)$$

with probability at least  $1 - \delta$  and where  $\beta = \log \frac{2\text{Tr}S}{\|S\|\delta}$ .

*Proof.* The theorem is a restatement of Theorem 7.3.1 of [Tropp, 2012] generalized to the separable Hilbert space case by means of the technique in Section 4 of [Stanislav, 2017].  $\square$

## C.2 Operator bounds

**Lemma 4.** *Under assumptions (Ass. 2) and (Ass. 3),  $\Sigma$ ,  $C$  and  $\Delta$  are trace-class operators.*

*Proof.* We only prove the result for  $\Delta$ , the proof for  $\Sigma$  and  $C$  being similar. Consider an orthonormal basis  $(\phi_i)_{i \in \mathbb{N}}$  of  $\mathcal{H}$ . Then, as  $\Delta$  is a positive self adjoint operator,

$$\begin{aligned} \text{Tr } \Delta &= \sum_{i=1}^{\infty} \langle \Delta \phi_i, \phi_i \rangle = \sum_{i=1}^{\infty} \mathbb{E}_{\mu} \left[ \sum_{j=1}^d \langle \partial_j K_x, \phi_i \rangle^2 \right] = \mathbb{E}_{\mu} \left[ \sum_{i=1}^{\infty} \sum_{j=1}^d \langle \partial_j K_x, \phi_i \rangle^2 \right] \\ &= \mathbb{E}_{\mu} \left[ \sum_{j=1}^d \|\partial_j K_x\|^2 \right] \leq \mathcal{K}_d. \end{aligned}$$

Hence,  $\Delta$  is a trace-class operator.  $\square$

The following quantities are useful for the estimates in this section:

$$\mathcal{N}_{\infty}(\lambda) = \sup_{x \in \text{supp}(\mu)} \left\| \Delta_{\lambda}^{-1/2} K_x \right\|_{\mathcal{H}}^2, \text{ and } \mathcal{F}_{\infty}(\lambda) = \sup_{x \in \text{supp}(\mu)} \left\| \Delta_{\lambda}^{-1/2} \nabla K_x \right\|_{\mathcal{H}}^2.$$

Note that under assumption (Ass. 3),  $\mathcal{N}_{\infty}(\lambda) \leq \frac{\mathcal{K}}{\lambda}$  and  $\mathcal{F}_{\infty}(\lambda) \leq \frac{\mathcal{K}_d}{\lambda}$ . Note also that under refined assumptions on the spectrum of  $\Delta$ , we could have a better dependence of the latter bounds with respect to  $\lambda$ . Let us now state three useful lemmas to bound the norms of the operators that appear during the proof of Proposition 2.

**Lemma 5.** *For any  $\lambda > 0$  and any  $\delta \in (0, 1]$ ,*

$$\begin{aligned} \left\| \Delta_{\lambda}^{-1/2} (\hat{C} - C) \Delta_{\lambda}^{-1/2} \right\| &\leq \frac{4\mathcal{N}_{\infty}(\lambda) \log \frac{2\text{Tr}\Sigma}{\mathcal{P}_{\mu}^{\lambda} \lambda \delta}}{3n} + \left[ \frac{2\mathcal{P}_{\mu}^{\lambda} \mathcal{N}_{\infty}(\lambda) \log \frac{2\text{Tr}\Sigma}{\mathcal{P}_{\mu}^{\lambda} \lambda \delta}}{n} \right]^{1/2} \\ &\quad + 8\mathcal{N}_{\infty}(\lambda) \left( \frac{\log(\frac{2}{\delta})}{n} + \sqrt{\frac{\log(\frac{2}{\delta})}{n}} \right) \\ &\quad + 16\mathcal{N}_{\infty}(\lambda) \left( \frac{\log(\frac{2}{\delta})}{n} + \sqrt{\frac{\log(\frac{2}{\delta})}{n}} \right)^2, \end{aligned}$$

with probability at least  $1 - \delta$ .

*Proof of Lemma 5.* We apply some concentration inequality to the operator  $\Delta_\lambda^{-1/2} \widehat{C} \Delta_\lambda^{-1/2}$  whose mean is exactly  $\Delta_\lambda^{-1/2} C \Delta_\lambda^{-1/2}$ . The calculation is the following:

$$\begin{aligned} \left\| \Delta_\lambda^{-1/2} (\widehat{C} - C) \Delta_\lambda^{-1/2} \right\| &= \left\| \Delta_\lambda^{-1/2} \widehat{C} \Delta_\lambda^{-1/2} - \Delta_\lambda^{-1/2} C \Delta_\lambda^{-1/2} \right\| \\ &\leq \left\| \Delta_\lambda^{-1/2} \widehat{\Sigma} \Delta_\lambda^{-1/2} - \Delta_\lambda^{-1/2} \Sigma \Delta_\lambda^{-1/2} \right\| \\ &\quad + \left\| \Delta_\lambda^{-1/2} (\widehat{m} \otimes \widehat{m}) \Delta_\lambda^{-1/2} - \Delta_\lambda^{-1/2} (m \otimes m) \Delta_\lambda^{-1/2} \right\| \\ &= \left\| \frac{1}{n} \sum_{i=1}^n \left[ (\Delta_\lambda^{-1/2} K_{x_i}) \otimes (\Delta_\lambda^{-1/2} K_{x_i}) - \Delta_\lambda^{-1/2} \Sigma \Delta_\lambda^{-1/2} \right] \right\| \\ &\quad + \left\| (\Delta_\lambda^{-1/2} \widehat{m}) \otimes (\Delta_\lambda^{-1/2} \widehat{m}) - (\Delta_\lambda^{-1/2} m) \otimes (\Delta_\lambda^{-1/2} m) \right\|. \end{aligned}$$

We estimate the two terms separately.

**Bound on the first term:** we use Proposition 8. To do this, we bound for  $i \in \llbracket 1, n \rrbracket$  :

$$\begin{aligned} \left\| (\Delta_\lambda^{-1/2} K_{x_i}) \otimes (\Delta_\lambda^{-1/2} K_{x_i}) - \Delta_\lambda^{-1/2} \Sigma \Delta_\lambda^{-1/2} \right\| &\leq \left\| \Delta_\lambda^{-1/2} K_{x_i} \right\|_{\mathcal{H}}^2 + \left\| \Delta_\lambda^{-1/2} \Sigma \Delta_\lambda^{-1/2} \right\| \\ &\leq 2\mathcal{N}_\infty(\lambda), \end{aligned}$$

and, for the second order moment,

$$\begin{aligned} \mathbb{E} \left( (\Delta_\lambda^{-1/2} K_{x_i}) \otimes (\Delta_\lambda^{-1/2} K_{x_i}) - \Delta_\lambda^{-1/2} \Sigma \Delta_\lambda^{-1/2} \right)^2 \\ = \mathbb{E} \left[ \left\| \Delta_\lambda^{-1/2} K_{x_i} \right\|_{\mathcal{H}}^2 (\Delta_\lambda^{-1/2} K_{x_i}) \otimes (\Delta_\lambda^{-1/2} K_{x_i}) \right] - \Delta_\lambda^{-1/2} \Sigma \Delta_\lambda^{-1} \Sigma \Delta_\lambda^{-1/2} \\ \preceq \mathcal{N}_\infty(\lambda) \Delta_\lambda^{-1/2} \Sigma \Delta_\lambda^{-1/2}. \end{aligned}$$

We conclude this first part of the proof by some estimation of the constant  $\beta = \log \frac{2 \text{Tr}(\Sigma \Delta_\lambda^{-1})}{\left\| \Delta_\lambda^{-1/2} \Sigma \Delta_\lambda^{-1/2} \right\|_\delta}$ . Using  $\text{Tr} \Sigma \Delta_\lambda^{-1} \leq \lambda^{-1} \text{Tr} \Sigma$ , it holds  $\beta \leq \log \frac{2 \text{Tr} \Sigma}{\mathcal{P}_\mu^\lambda \lambda \delta}$ . Therefore,

$$\begin{aligned} \left\| \frac{1}{n} \sum_{i=1}^n \left[ (\Delta_\lambda^{-1/2} K_{x_i}) \otimes (\Delta_\lambda^{-1/2} K_{x_i}) - \Delta_\lambda^{-1/2} \Sigma \Delta_\lambda^{-1/2} \right] \right\| \\ \leq \frac{4\mathcal{N}_\infty(\lambda) \log \frac{2 \text{Tr} \Sigma}{\mathcal{P}_\mu^\lambda \lambda \delta}}{3n} + \left[ \frac{2 \mathcal{P}_\mu^\lambda \mathcal{N}_\infty(\lambda) \log \frac{2 \text{Tr} \Sigma}{\mathcal{P}_\mu^\lambda \lambda \delta}}{n} \right]^{1/2}. \end{aligned}$$

**Bound on the second term.** Denote by  $v = \Delta_\lambda^{-1/2} m$  and  $\widehat{v} = \Delta_\lambda^{-1/2} \widehat{m}$ . A simple calculation leads to

$$\begin{aligned} \|\widehat{v} \otimes \widehat{v} - v \otimes v\| &\leq \|v \otimes (\widehat{v} - v)\| + \|(\widehat{v} - v) \otimes v\| + \|(\widehat{v} - v) \otimes (\widehat{v} - v)\| \\ &\leq 2\|v\| \|\widehat{v} - v\| + \|\widehat{v} - v\|^2. \end{aligned}$$

We bound  $\|\widehat{v} - v\|$  with Proposition 7. It holds:  $\widehat{v} - v = \Delta_\lambda^{-1/2} (\widehat{m} - m) = \frac{1}{n} \sum_{i=1}^n \Delta_\lambda^{-1/2} (K_{x_i} - m) = \frac{1}{n} \sum_{i=1}^n Z_i$ , with  $Z_i = \Delta_\lambda^{-1/2} (K_{x_i} - m)$ . Obviously for any  $i \in \llbracket 1, n \rrbracket$ ,  $\mathbb{E}(Z_i) = 0$ , and  $\|Z_i\| \leq \|\Delta_\lambda^{-1/2} K_{x_i}\| + \|\Delta_\lambda^{-1/2} m\| \leq 2\sqrt{\mathcal{N}_\infty(\lambda)}$ . Furthermore,

$$\begin{aligned} \mathbb{E} \|Z_i\|^2 &= \mathbb{E} \left\langle \Delta_\lambda^{-1/2} (K_{x_i} - m), \Delta_\lambda^{-1/2} (K_{x_i} - m) \right\rangle = \mathbb{E} \left\| \Delta_\lambda^{-1/2} K_{x_i} \right\|^2 - \left\| \Delta_\lambda^{-1/2} m \right\|^2 \\ &\leq \mathcal{N}_\infty(\lambda). \end{aligned}$$

Thus, for  $p \geq 2$ ,

$$\mathbb{E} \|Z_i\|^p \leq \mathbb{E} (\|Z_i\|^{p-2} \|Z_i\|^2) \leq \frac{1}{2} p! \left( \sqrt{\mathcal{N}_\infty(\lambda)} \right)^2 \left( 2\sqrt{\mathcal{N}_\infty(\lambda)} \right)^{p-2},$$

hence, by applying Proposition 7 with  $L = 2\sqrt{\mathcal{N}_\infty(\lambda)}$  and  $\sigma = \sqrt{\mathcal{N}_\infty(\lambda)}$ ,

$$\begin{aligned}\|\hat{v} - v\| &\leq \frac{4\sqrt{\mathcal{N}_\infty(\lambda)} \log(2/\delta)}{n} + \sqrt{\frac{2\mathcal{N}_\infty(\lambda) \log(2/\delta)}{n}} \\ &\leq 4\sqrt{\mathcal{N}_\infty(\lambda)} \left( \frac{\log(2/\delta)}{n} + \sqrt{\frac{\log(2/\delta)}{n}} \right).\end{aligned}$$

Finally, as  $\|v\| \leq \sqrt{\mathcal{N}_\infty(\lambda)}$ ,

$$\begin{aligned}\|\hat{v} \otimes \hat{v} - v \otimes v\| &\leq 8\mathcal{N}_\infty(\lambda) \left( \frac{\log(2/\delta)}{n} + \sqrt{\frac{\log(2/\delta)}{n}} \right) \\ &\quad + 16\mathcal{N}_\infty(\lambda) \left( \frac{\log(2/\delta)}{n} + \sqrt{\frac{\log(2/\delta)}{n}} \right)^2.\end{aligned}$$

This concludes the proof of Lemma 5.  $\square$

**Lemma 6.** For any  $\lambda \in (0, \|\Delta\|]$  and any  $\delta \in (0, 1]$ ,

$$\left\| \Delta_\lambda^{-1/2} (\hat{\Delta} - \Delta) \Delta_\lambda^{-1/2} \right\| \leq \frac{4\mathcal{F}_\infty(\lambda) \log \frac{4\text{Tr}\Delta}{\lambda\delta}}{3n} + \sqrt{\frac{2\mathcal{F}_\infty(\lambda) \log \frac{4\text{Tr}\Delta}{\lambda\delta}}{n}},$$

with probability at least  $1 - \delta$ .

*Proof of Lemma 6.* As in the proof of Lemma 5, we want to apply some concentration inequality to the operator  $\Delta_\lambda^{-1/2} \hat{\Delta} \Delta_\lambda^{-1/2}$ , whose mean is exactly  $\Delta_\lambda^{-1/2} \Delta \Delta_\lambda^{-1/2}$ . The proof is almost the same as Lemma 5. We start by writing

$$\begin{aligned}\left\| \Delta_\lambda^{-1/2} (\hat{\Delta} - \Delta) \Delta_\lambda^{-1/2} \right\| &= \left\| \Delta_\lambda^{-1/2} \hat{\Delta} \Delta_\lambda^{-1/2} - \Delta_\lambda^{-1/2} \Delta \Delta_\lambda^{-1/2} \right\| \\ &= \left\| \frac{1}{n} \sum_{i=1}^n \left[ (\Delta_\lambda^{-1/2} \nabla K_{x_i}) \otimes (\Delta_\lambda^{-1/2} \nabla K_{x_i}) - \Delta_\lambda^{-1/2} \Delta \Delta_\lambda^{-1/2} \right] \right\|.\end{aligned}$$

In order to use Proposition 8, we bound for  $i \in \llbracket 1, n \rrbracket$ ,

$$\begin{aligned}\left\| (\Delta_\lambda^{-1/2} \nabla K_{x_i}) \otimes (\Delta_\lambda^{-1/2} \nabla K_{x_i}) - \Delta_\lambda^{-1/2} \Delta \Delta_\lambda^{-1/2} \right\| &\leq \left\| \Delta_\lambda^{-1/2} \nabla K_{x_i} \right\|_{\mathcal{H}}^2 + \left\| \Delta_\lambda^{-1/2} \Delta \Delta_\lambda^{-1/2} \right\| \\ &\leq 2\mathcal{F}_\infty(\lambda),\end{aligned}$$

and, for the second order moment,

$$\begin{aligned}\mathbb{E} \left[ \left( (\Delta_\lambda^{-1/2} \nabla K_{x_i}) \otimes (\Delta_\lambda^{-1/2} \nabla K_{x_i}) - \Delta_\lambda^{-1/2} \Delta \Delta_\lambda^{-1/2} \right)^2 \right] \\ = \mathbb{E} \left[ \left\| \Delta_\lambda^{-1/2} \nabla K_{x_i} \right\|_{\mathcal{H}}^2 (\Delta_\lambda^{-1/2} \nabla K_{x_i}) \otimes (\Delta_\lambda^{-1/2} \nabla K_{x_i}) \right] - \Delta_\lambda^{-1/2} \Delta \Delta_\lambda^{-1/2} \\ \preceq \mathcal{F}_\infty(\lambda) \Delta_\lambda^{-1/2} \Delta \Delta_\lambda^{-1/2}.\end{aligned}$$

We conclude by some estimation of  $\beta = \log \frac{2\text{Tr}(\Delta \Delta_\lambda^{-1})}{\|\Delta_\lambda^{-1} \Delta\|_\delta}$ . Since  $\text{Tr}(\Delta \Delta_\lambda^{-1}) \leq \lambda^{-1} \text{Tr} \Delta$  and for  $\lambda \leq \|\Delta\|$ ,  $\|\Delta_\lambda^{-1} \Delta\| \geq 1/2$ , it follow that  $\beta \leq \log \frac{4\text{Tr}\Delta}{\lambda\delta}$ . The conclusion then follows from (13).  $\square$

**Lemma 7** (Bounding operators). For any  $\lambda > 0$ ,  $\delta \in (0, 1)$ , and  $n \geq 15\mathcal{F}_\infty(\lambda) \log \frac{4\text{Tr}\Delta}{\lambda\delta}$ ,

$$\left\| \hat{\Delta}_\lambda^{-1/2} \Delta_\lambda^{1/2} \right\|^2 \leq 2,$$

with probability at least  $1 - \delta$ .

The proof of this result relies on the following lemma (see proof in [Rudi and Rosasco, 2017, Proposition 8]).

**Lemma 8.** *Let  $\mathcal{H}$  be a separable Hilbert space,  $A$  and  $B$  two bounded self-adjoint positive linear operators on  $\mathcal{H}$  and  $\lambda > 0$ . Then*

$$\left\| (A + \lambda I)^{-1/2} (B + \lambda I)^{1/2} \right\| \leq (1 - \beta)^{-1/2},$$

with  $\beta = \lambda_{\max}((B + \lambda I)^{-1/2} (B - A) (B + \lambda I)^{-1/2}) < 1$ , where  $\lambda_{\max}(O)$  is the largest eigenvalue of the self-adjoint operator  $O$ .

We can now write the proof of Lemma 7.

*Proof of Lemma 7.* Thanks to Lemma 8, we see that

$$\left\| \widehat{\Delta}_\lambda^{-1/2} \Delta_\lambda^{1/2} \right\|^2 \leq \left( 1 - \lambda_{\max} \left( \Delta_\lambda^{-1/2} (\widehat{\Delta} - \Delta) \Delta_\lambda^{-1/2} \right) \right)^{-1},$$

and as  $\left\| \Delta_\lambda^{-1/2} (\widehat{\Delta} - \Delta) \Delta_\lambda^{-1/2} \right\| < 1$ , we have:

$$\left\| \widehat{\Delta}_\lambda^{-1/2} \Delta_\lambda^{1/2} \right\|^2 \leq \left( 1 - \left\| \Delta_\lambda^{-1/2} (\widehat{\Delta} - \Delta) \Delta_\lambda^{-1/2} \right\| \right)^{-1}.$$

We can then apply the bound of Lemma 6 to obtain that, if  $\lambda$  is such that  $\frac{4\mathcal{F}_\infty(\lambda) \log \frac{4\text{Tr}\Delta}{\lambda\delta}}{3n} + \sqrt{\frac{2\mathcal{F}_\infty(\lambda) \log \frac{4\text{Tr}\Delta}{\lambda\delta}}{n}} \leq \frac{1}{2}$ , then  $\left\| \widehat{\Delta}_\lambda^{-1/2} \Delta_\lambda^{1/2} \right\|^2 \leq 2$  with probability  $1 - \delta$ . The condition on  $\lambda$  is satisfied when  $n \geq 15\mathcal{F}_\infty(\lambda) \log \frac{4\text{Tr}\Delta}{\lambda\delta}$ . □

## D Calculation of the bias in the Gaussian case

We can derive a rate of convergence when  $\mu$  is a one-dimensional Gaussian. Hence, we consider the one-dimensional distribution  $d\mu$  as the normal distribution with mean zero and variance  $1/(4a)$ . Let  $b > 0$ , we consider also the following approximation  $\mathcal{P}_\kappa^{-1} = \inf_{f \in \mathcal{H}} \frac{\mathbb{E}_\mu(f'^2) + \kappa \|f\|_{\mathcal{H}}^2}{\text{var}_\mu(f)}$  where  $\mathcal{H}$  is the RKHS associated with the Gaussian kernel  $\exp(-b(x - y)^2)$ . Our goal is to study how  $\mathcal{P}_\kappa$  tends to  $\mathcal{P}$  when  $\kappa$  tends to zero.

**Proposition 9** (Rate of convergence for the bias in the one-dimensional Gaussian case). *If  $d\mu$  is a one-dimensional Gaussian of mean zero and variance  $1/(4a)$  there exists  $A > 0$  such that, if  $\lambda \leq A$ , it holds*

$$\mathcal{P}^{-1} \leq \mathcal{P}_\lambda^{-1} \leq \mathcal{P}^{-1} (1 + B\lambda \ln^2(1/\lambda)), \quad (14)$$

where  $A$  and  $B$  depend only on the constant  $a$ .

We will show it by considering a specific orthonormal basis of  $L^2(\mu)$ , where all operators may be expressed simply in closed form.

### D.1 An orthonormal basis of $L^2(\mu)$ and $\mathcal{H}$

We begin by giving an explicit a basis of  $L^2(\mu)$  which is also a basis of  $\mathcal{H}$ .

**Proposition 10** (Explicit basis). *We consider*

$$f_i(x) = \left(\frac{c}{a}\right)^{1/4} (2^i i!)^{-1/2} e^{-(c-a)x^2} H_i(\sqrt{2c}x),$$

where  $H_i$  is the  $i$ -th Hermite polynomial, and  $c = \sqrt{a^2 + 2ab}$ . Then,

- $(f_i)_{i \geq 0}$  is an orthonormal basis of  $L^2(\mu)$ ;
- $\tilde{f}_i = \lambda_i^{1/2} f_i$  forms an orthonormal basis of  $\mathcal{H}$ , with  $\lambda_i = \sqrt{\frac{2a}{a+b+c}} \left(\frac{b}{a+b+c}\right)^i$ .

*Proof.* We can check that this is indeed an orthonormal basis of  $L^2(\mu)$ :

$$\begin{aligned}\langle f_k, f_m \rangle_{L^2(\mu)} &= \int_{\mathbb{R}} \frac{1}{\sqrt{2\pi/4a}} e^{-2ax^2} \left(\frac{c}{a}\right)^{1/2} e^{-2(c-a)x^2} (2^k k!)^{-1/2} (2^m m!)^{-1/2} H_k(\sqrt{2c}x) H_m(\sqrt{2c}x) dx \\ &= \sqrt{2c/\pi} (2^k k!)^{-1/2} (2^m m!)^{-1/2} \int_{\mathbb{R}} e^{-2cx^2} H_k(\sqrt{2c}x) H_m(\sqrt{2c}x) dx \\ &= \delta_{mk},\end{aligned}$$

using properties of Hermite polynomials. Considering the integral operator  $T : L^2(\mu) \rightarrow L^2(\mu)$ , defined as  $Tf(y) = \int_{\mathbb{R}} e^{-b(x-y)^2} f(x) d\mu(x)$ , we have:

$$\begin{aligned}Tf_k(y) &= \left(\frac{c}{a}\right)^{1/4} (2^k k!)^{-1/2} \int_{\mathbb{R}} e^{-(c-a)x^2} H_k(\sqrt{2c}x) \frac{1}{\sqrt{2\pi/4a}} e^{-2ax^2} e^{-b(x-y)^2} dx \\ &= \left(\frac{c}{a}\right)^{1/4} (2^k k!)^{-1/2} e^{-by^2} \frac{1}{\sqrt{2\pi/4a}} \frac{1}{\sqrt{2c}} \int_{\mathbb{R}} e^{-(a+b+c)x^2} H_k(\sqrt{2c}x) e^{2bxy} \sqrt{2c} dx \\ &= \left(\frac{c}{a}\right)^{1/4} (2^k k!)^{-1/2} e^{-by^2} \frac{1}{\sqrt{2\pi/4a}} \frac{1}{\sqrt{2c}} \int_{\mathbb{R}} e^{-\frac{a+b+c}{2c}x^2} H_k(x) e^{\frac{2b}{\sqrt{2c}}xy} dx.\end{aligned}$$

We consider  $u$  such that  $\frac{1}{1-u^2} = \frac{a+b+c}{2c}$ , that is,  $1 - \frac{2c}{a+b+c} = \frac{a+b-c}{a+b+c} = \frac{b^2}{(a+b+c)^2} = u^2$ , which implies that  $u = \frac{b}{a+b+c}$ ; and then  $\frac{2u}{1-u^2} = \frac{b}{c}$ .

Thus, using properties of Hermite polynomials (see Section [D.4](#)), we get:

$$\begin{aligned}Tf_k(y) &= \left(\frac{c}{a}\right)^{1/4} (2^k k!)^{-1/2} e^{-by^2} \frac{1}{\sqrt{2\pi/4a}} \frac{1}{\sqrt{2c}} \sqrt{\pi} \sqrt{1-u^2} H_k(\sqrt{2c}y) \exp\left(\frac{u^2}{1-u^2} 2cy^2\right) u^k \\ &= \left(\frac{c}{a}\right)^{1/4} (2^k k!)^{-1/2} \frac{1}{\sqrt{2\pi/4a}} \frac{1}{\sqrt{2c}} \sqrt{\pi} \frac{\sqrt{2c}}{\sqrt{a+b+c}} H_k(\sqrt{2c}y) \exp(buy^2 - by^2) u^k \\ &= \left(\frac{c}{a}\right)^{1/4} (2^k k!)^{-1/2} \frac{\sqrt{2a}}{\sqrt{a+b+c}} H_k(\sqrt{2c}y) \exp\left(-by^2 + 2cy^2 \left(-1 + \frac{1}{1-u^2}\right)\right) u^k \\ &= \frac{\sqrt{2a}}{\sqrt{a+b+c}} \left(\frac{b}{a+b+c}\right)^k f_k(y) \\ &= \lambda_k f_k(y).\end{aligned}$$

This implies that  $(\tilde{f}_i)$  is an orthonormal basis of  $\mathcal{H}$ . □

We can now rewrite our problem in this basis, which is the purpose of the following lemma:

**Lemma 9** (Reformulation of the problem in the basis). *Let  $(\alpha_i)_i \in \ell^2(\mathbb{N})$ . For  $f = \sum_{i=0}^{\infty} \alpha_i f_i$ , we have:*

- $\|f\|_{\mathcal{H}}^2 = \sum_{i=0}^{\infty} \alpha_i^2 \lambda_i^{-1} = \alpha^\top \text{Diag}(\lambda)^{-1} \alpha$ ;
- $\text{var}_\mu(f(x)) = \sum_{i=0}^{\infty} \alpha_i^2 - \left(\sum_{i=0}^{\infty} \eta_i \alpha_i\right)^2 = \alpha^\top (I - \eta \eta^\top) \alpha$ ;
- $\mathbb{E}_\mu f'(x)^2 = \sum_{i=0}^{\infty} \sum_{j=0}^{\infty} \alpha_i \alpha_j (M^\top M)_{ij} = \alpha^\top M^\top M \alpha$ ,

where  $\eta$  is the vector of coefficients of  $\mathbf{1}_{L^2(\mu)}$  and  $M$  the matrix of coordinates of the derivative operator in the  $(f_i)$  basis. The problem can be rewritten under the following form:

$$\mathcal{P}_\kappa^{-1} = \inf_{\alpha} \frac{\alpha^\top (M^\top M + \kappa \text{Diag}(\lambda)^{-1}) \alpha}{\alpha^\top (I - \eta \eta^\top) \alpha}, \quad (15)$$

where

- $\forall k \geq 0, \eta_{2k} = \left(\frac{c}{a}\right)^{1/4} \sqrt{\frac{2a}{a+c}} \left(\frac{b}{a+b+c}\right)^k \frac{\sqrt{(2k)!}}{2^k k!}$  and  $\eta_{2k+1} = 0$
- $\forall i \in \mathbb{N}, (M^\top M)_{ii} = \frac{1}{c} (2i(a^2 + c^2) + (a - c)^2)$  and  $(M^\top M)_{i,i+2} = \frac{1}{c} \left( (a^2 - c^2) \sqrt{(i+1)(i+2)} \right)$ .

*Proof. Covariance operator.* Since  $(f_i)$  is orthonormal for  $L^2(\mu)$ , we only need to compute for each  $i$ ,  $\eta_i = \mathbb{E}_\mu f_i(x)$ , as follows (and using properties of Hermite polynomials):

$$\begin{aligned} \eta_i &= \langle 1, f_i \rangle_{L^2(\mu)} = \left(\frac{c}{a}\right)^{1/4} (2^i i!)^{-1/2} \int_{\mathbb{R}} e^{-(c-a)x^2} H_i(\sqrt{2c}x) e^{-2ax^2} \sqrt{2a/\pi} dx \\ &= \left(\frac{c}{a}\right)^{1/4} (2^i i!)^{-1/2} \sqrt{a/(\pi c)} \int_{\mathbb{R}} e^{-\frac{a+c}{2c}x^2} H_i(x) dx \\ &= \left(\frac{c}{a}\right)^{1/4} (2^i i!)^{-1/2} \sqrt{\frac{2a}{a+c}} \left(\frac{c-a}{c+a}\right)^{i/2} H_i(0) i!. \end{aligned}$$

This is only non-zero for  $i$  even, and

$$\begin{aligned} \eta_{2k} &= \left(\frac{c}{a}\right)^{1/4} (2^{2k} (2k)!)^{-1/2} \sqrt{\frac{2a}{a+c}} \left(\frac{c-a}{c+a}\right)^k H_{2k}(0) (-1)^k \\ &= \left(\frac{c}{a}\right)^{1/4} (2^{2k} (2k)!)^{-1/2} \sqrt{\frac{2a}{a+c}} \left(\frac{c-a}{c+a}\right)^k \frac{(2k)!}{k!} \\ &= \left(\frac{c}{a}\right)^{1/4} \sqrt{\frac{2a}{a+c}} \left(\frac{c-a}{c+a}\right)^k \frac{\sqrt{(2k)!}}{2^k k!} \\ &= \left(\frac{c}{a}\right)^{1/4} \sqrt{\frac{2a}{a+c}} \left(\frac{b}{a+b+c}\right)^k \frac{\sqrt{(2k)!}}{2^k k!}. \end{aligned}$$

Note that we must have  $\sum_{i=0}^{\infty} \eta_i^2 = \|1\|_{L^2(\mu)}^2 = 1$ , which can indeed be checked —the shrewd reader will recognize the entire series development of  $(1 - z^2)^{-1/2}$ .

**Derivatives.** We have, using the recurrence properties of Hermite polynomials:

$$f'_i = \frac{a-c}{\sqrt{c}} \sqrt{i+1} f_{i+1} + \frac{a+c}{\sqrt{c}} \sqrt{i} f_{i-1},$$

for  $i > 0$ , while for  $i = 0$ ,  $f'_0 = \frac{a-c}{\sqrt{c}} f_1$ . Thus, if  $M$  is the matrix of coordinates of the derivative operator in the basis  $(f_i)$ , we have  $M_{i+1,i} = \frac{a-c}{\sqrt{c}} \sqrt{i+1}$  and  $M_{i-1,i} = \frac{a+c}{\sqrt{c}} \sqrt{i}$ . This leads to

$$\langle f'_i, f'_j \rangle_{L^2(\mu)} = (M^\top M)_{ij}.$$

We have

$$\begin{aligned} (M^\top M)_{ii} &= \langle f'_i, f'_i \rangle_{L^2(\mu)} \\ &= \frac{1}{c} \left( (i+1)(a-c)^2 + i(a+c)^2 \right) \\ &= \frac{1}{c} \left( 2i(a^2 + c^2) + (a-c)^2 \right) \text{ for } i \geq 0, \\ (M^\top M)_{i,i+2} &= \langle f'_i, f'_{i+2} \rangle_{L^2(\mu)} \\ &= \frac{1}{c} \left( (a^2 - c^2) \sqrt{(i+1)(i+2)} \right) \text{ for } i \geq 0. \end{aligned}$$

Note that we have  $M\eta = 0$  as these are the coordinates of the derivative of the constant function (this can be checked directly by computing  $(M\eta)_{2k+1} = M_{2k+1,2k}\eta_{2k} + M_{2k+1,2k+2}\eta_{2k+2}$ ).

□

## D.2 Unregularized solution

Recall that we want to solve  $\mathcal{P}^{-1} = \inf_f \frac{\mathbb{E}_\mu f'(x)^2}{\text{var}_\mu(f(x))}$ . The following lemma characterizes the optimal solution completely.

**Lemma 10** (Optimal solution for one dimensional Gaussian). *We know that the solution of the Poincaré problem is  $\mathcal{P}^{-1} = 4a$  which is attained for  $f_*(x) = x$ . The decomposition of  $f_*$  is the basis  $(f_i)_i$  is given by  $f_* = \sum_{i \geq 0} \nu_i f_i$ ,*

where  $\forall k \geq 0$ ,  $\nu_{2k} = 0$  and  $\nu_{2k+1} = \left(\frac{c}{a}\right)^{1/4} \frac{\sqrt{a}}{2c} \left(\frac{2c}{a+c}\right)^{3/2} \left(\frac{b}{a+b+c}\right)^k \frac{\sqrt{(2k+1)!}}{2^k k!}$ .

*Proof.* We thus need to compute:

$$\begin{aligned} \nu_i &= \langle f_*, f_i \rangle_{L^2(\mu)} \\ &= \left(\frac{c}{a}\right)^{1/4} (2^i i!)^{-1/2} \int_{\mathbb{R}} e^{-(c-a)x^2} H_i(\sqrt{2c}x) e^{-2ax^2} \sqrt{2a/\pi} dx \\ &= \left(\frac{c}{a}\right)^{1/4} (2^i i!)^{-1/2} \sqrt{2a/\pi} \int_{\mathbb{R}} e^{-(c+a)x^2} H_i(\sqrt{2c}x) x dx \\ &= \left(\frac{c}{a}\right)^{1/4} (2^i i!)^{-1/2} \sqrt{2a/\pi} \frac{1}{2c} \int_{\mathbb{R}} e^{-\frac{c+a}{2c}x^2} H_i(x) x dx \\ &= \left(\frac{c}{a}\right)^{1/4} (2^i i!)^{-1/2} \sqrt{2a/\pi} \frac{1}{4c} \int_{\mathbb{R}} e^{-\frac{c+a}{2c}x^2} [H_{i+1}(x) + 2iH_{i-1}(x)] dx \\ &= \left(\frac{c}{a}\right)^{1/4} (2^i i!)^{-1/2} \sqrt{2a/\pi} \frac{\sqrt{\pi}}{4c} \sqrt{\frac{2c}{a+c}} \left(\frac{c-a}{c+a}\right)^{(i+1)/2} H_{i+1}(0) i^{i+1} \\ &\quad + 2i \left(\frac{c-a}{c+a}\right)^{(i-1)/2} H_{i-1}(0) i^{i-1}, \end{aligned}$$

which is only non-zero for  $i$  odd. We have:

$$\begin{aligned} \nu_{2k+1} &= \left(\frac{c}{a}\right)^{1/4} (2^{2k+1} (2k+1)!)^{-1/2} \sqrt{2a/\pi} \frac{\sqrt{\pi}}{4c} \sqrt{\frac{2c}{a+c}} \left(\frac{c-a}{c+a}\right)^{k+1} H_{2k+2}(0) (-1)^{k+1} \\ &\quad + 2(2k+1) \left(\frac{c-a}{c+a}\right)^k H_{2k}(0) (-1)^k \\ &= \left(\frac{c}{a}\right)^{1/4} (2^{2k+1} (2k+1)!)^{-1/2} \sqrt{2a/\pi} \frac{\sqrt{\pi}}{4c} \sqrt{\frac{2c}{a+c}} \left(\frac{c-a}{c+a}\right)^{k+1} H_{2k+2}(0) (-1)^{k+1} \\ &\quad + 2(2k+1) \left(\frac{c-a}{c+a}\right)^k H_{2k}(0) (-1)^k \\ &= \left(\frac{c}{a}\right)^{1/4} (2^{2k+1} (2k+1)!)^{-1/2} \sqrt{2a/\pi} \frac{\sqrt{\pi}}{4c} \sqrt{\frac{2c}{a+c}} \left(\frac{c-a}{c+a}\right)^k (-1)^k \\ &\quad \left( \left(\frac{c-a}{c+a}\right) 2(2k+1) H_{2k}(0) + 2(2k+1) H_{2k}(0) \right) \\ &= \left(\frac{c}{a}\right)^{1/4} (2^{2k+1} (2k+1)!)^{-1/2} \sqrt{2a/\pi} \frac{\sqrt{\pi}}{4c} \sqrt{\frac{2c}{a+c}} \left(\frac{c-a}{c+a}\right)^k (-1)^k 2(2k+1) H_{2k}(0) \frac{2c}{c+a} \\ &= \left(\frac{c}{a}\right)^{1/4} (2^{2k+1} (2k+1)!)^{-1/2} \sqrt{a} \frac{1}{c\sqrt{2}} \left(\frac{2c}{a+c}\right)^{3/2} \left(\frac{c-a}{c+a}\right)^k (-1)^k (2k+1) H_{2k}(0) \\ &= \left(\frac{c}{a}\right)^{1/4} (2^{2k+1} (2k+1)!)^{-1/2} \sqrt{a} \frac{1}{c\sqrt{2}} \left(\frac{2c}{a+c}\right)^{3/2} \left(\frac{c-a}{c+a}\right)^k (2k+1) \frac{(2k)!}{k!} \\ &= \left(\frac{c}{a}\right)^{1/4} \frac{\sqrt{a}}{2c} \left(\frac{2c}{a+c}\right)^{3/2} \left(\frac{c-a}{c+a}\right)^k \frac{\sqrt{(2k+1)!}}{2^k k!} \\ &= \left(\frac{c}{a}\right)^{1/4} \frac{\sqrt{a}}{2c} \left(\frac{2c}{a+c}\right)^{3/2} \left(\frac{b}{a+b+c}\right)^k \frac{\sqrt{(2k+1)!}}{2^k k!}. \end{aligned}$$

□

Note that we have:

$$\begin{aligned}\mu^\top \nu &= \langle 1, f_* \rangle_{L^2(\mu)} = 0 \\ \|\nu\|^2 &= \|f_*\|_{L^2(\mu)}^2 = \frac{1}{4a} \\ M^\top M \nu &= 4a\nu.\end{aligned}$$

The first equality is obvious from the odd/even sparsity patterns. The third one can be checked directly. The second one can probably be checked by another shrewd entire series development.

If we had  $\nu^\top \text{Diag}(\lambda)^{-1} \nu$  finite, then we would have

$$\mathcal{P}^{-1} \leq \mathcal{P}_\kappa^{-1} \leq \mathcal{P}^{-1} (1 + \kappa \cdot \nu^\top \text{Diag}(\lambda)^{-1} \nu),$$

which would be very nice and simple. Unfortunately, this is not true (see below).

### D.2.1 Some further properties for $\nu$

We have:  $\frac{c-a}{c+a} = \frac{b}{a+b+c}$ , and the following equivalent  $\frac{\sqrt{\sqrt{k}(2k/e)^{2k+1}}}{2^k \sqrt{k}(k/e)^k} \sim \frac{k^{1/4+k+1/2}}{k^{k+1/2}} \sim k^{1/4}$  (up to constants). Thus

$$|\nu_{2k+1}^2 \lambda_{2k+1}^{-1}| \leq \left(\frac{c}{a}\right)^{1/2} \frac{a}{c^2} \left(\frac{2c}{a+c}\right)^3 \left(\frac{b}{a+b+c}\right)^{2k-2k-1} \sqrt{\frac{a+b+c}{2a}} \sqrt{k} = \Theta(\sqrt{k})$$

hence,

$$\sum_{k=0}^{2m+1} \nu_k^2 \lambda_k^{-1} \sim \Theta(m^{3/2}).$$

Consequently,  $\nu^\top \text{Diag}(\lambda)^{-1} \nu = +\infty$ .

Note that we have the extra recursion

$$\nu_k = \frac{1}{\sqrt{4c}} [\sqrt{k+1} \eta_{k+1} + \sqrt{k} \eta_{k-1}].$$

### D.3 Truncation

We are going to consider a truncated version  $\alpha$ , of  $\nu$ , with only the first  $2m+1$  elements. That is  $\alpha_k = \nu_k$  for  $k \leq 2m+1$  and 0 otherwise.

**Lemma 11** (Convergence of the truncation). *Consider  $g^m = \sum_{k=0}^{\infty} \alpha_k f_k = \sum_{k=0}^{2m+1} \nu_k f_k$ , recall that  $u = \frac{b}{a+b+c}$ . For  $m \geq \max\{-\frac{3}{4 \ln u}, \frac{1}{6c}\}$ , we have the following:*

- (i)  $|\|\alpha\|^2 - \frac{1}{4a}| \leq L m u^{2m}$
- (ii)  $\alpha^\top \eta = 0$
- (iii)  $|\alpha^\top M^\top M \alpha - 1| \leq L m^2 u^{2m}$
- (iv)  $\alpha^\top \text{Diag}(\lambda)^{-1} \alpha \leq L m^{3/2},$

where  $L$  depends only on  $a, b, c$ .

*Proof.* We show successively the four estimations.

(i) Let us calculate  $\|\alpha\|^2$ . We have:  $\|\alpha\|^2 - \frac{1}{4a} = \|\alpha\|^2 - \|\nu\|^2 = \sum_{k=m+1}^{\infty} \nu_{2k+1}^2$ . Recall that  $u = \frac{b}{a+b+c} \leq 1$ , by noting  $A = \left(\frac{c}{a}\right)^{1/4} \frac{\sqrt{a}}{2c} \left(\frac{2c}{a+c}\right)^{3/2}$ , we have

$$\|\alpha\|^2 - \frac{1}{4a} = A^2 \sum_{k=m+1}^{\infty} \frac{(2k+1)!}{(2^k k!)^2} u^{2k}.$$

Now by Stirling inequality:

$$\begin{aligned}
 \frac{(2k+1)!}{(2^k k!)^2} u^{2k} &\leq \frac{e(2k+1)^{2k+1+1/2} e^{-(2k+1)}}{(\sqrt{2\pi} 2^k k^{k+1/2} e^{-k})^2} u^{2k} \\
 &= \frac{\sqrt{2}}{\pi} \left(1 + \frac{1}{2k}\right)^{2k+1} \left(k + \frac{1}{2}\right)^{1/2} u^{2k} \\
 &\leq \frac{4e}{\pi} \sqrt{k} u^{2k}.
 \end{aligned}$$

And for  $m \geq -\frac{1}{4 \ln u}$ ,

$$\begin{aligned}
 \sum_{m+1}^{\infty} \sqrt{k} u^{2k} &\leq \int_m^{\infty} \sqrt{x} u^{2x} dx \\
 &\leq \int_m^{\infty} x u^{2x} dx \\
 &= u^{2m} \frac{(1 - 2m \ln u)}{(2 \ln u)^2} \\
 &\leq \frac{m u^{2m}}{\ln(1/u)}.
 \end{aligned}$$

Hence finally:

$$\left| \|\alpha\|^2 - \frac{1}{4a} \right| \leq \frac{4A^2 e}{\pi \ln(1/u)} m u^{2m}.$$

(ii) is straightforward because of the odd/even sparsity of  $\nu$  and  $\eta$ .

(iii) Let us calculate  $\|M\alpha\|^2$ . We have:

$$\begin{aligned}
 \|M\alpha\|^2 - 1 &= \|M\alpha\|^2 - \|M\nu\|^2 \\
 &= \sum_{k,j \geq m+1} \nu_{2k+1} \nu_{2j+1} (M^\top M)_{2k+1, 2j+1} \\
 &= \sum_{k=m+1}^{\infty} \nu_{2k+1}^2 (M^\top M)_{2k+1, 2k+1} + 2 \sum_{k=m+1}^{\infty} \nu_{2k+1} \nu_{2k+3} (M^\top M)_{2k+1, 2k+3} \\
 &= \frac{A^2}{c} \sum_{k=m+1}^{\infty} \frac{(2k+1)!}{(2^k k!)^2} (2(2k+1)(a^2 + c^2) + (a-c)^2) u^{2k} \\
 &\quad - \frac{2A^2 ab}{c} \sum_{k=m+1}^{\infty} \frac{\sqrt{(2k+1)!}}{(2^k k!)} \frac{\sqrt{(2k+3)!}}{(2^{k+1} (k+1)!)} \sqrt{(2k+2)(2k+3)} u^{2k+1}.
 \end{aligned}$$

Let us call the two terms  $u_m$  and  $v_m$  respectively. For the first term, when  $m \geq \max\{-\frac{3}{4 \ln u}, \frac{1}{6c}\}$  a calculation as

in (i) leads to:

$$\begin{aligned}
 |u_m| &\leq \frac{24A^2e(u^2+c^2)}{\pi c} \int_m^\infty x\sqrt{x}u^{2x}dx + \frac{(a-c)^2}{c} (\|\alpha\|^2 - \|\nu\|^2) \\
 &\leq \frac{24A^2e(u^2+c^2)}{\pi c} \int_m^\infty x^2u^{2x}dx - \frac{4A^2e}{\pi \ln u} mu^{2m} \\
 &= -\frac{24A^2e(u^2+c^2)}{\pi c} \frac{u^{2m}(2m \ln u(2m \ln(u)-2)+2)}{8 \ln^3(u)} - \frac{4A^2e}{\pi \ln u} mu^{2m} \\
 &\leq -\frac{12A^2e(a^2+c^2)}{\pi c \ln(u)} m^2 u^{2m} - \frac{4A^2e}{\pi \ln u} mu^{2m} \\
 &\leq -\frac{4A^2e}{\pi \ln u} \left( \frac{3(a^2+c^2)}{c} m + 1 \right) mu^{2m} \\
 &\leq \frac{24A^2ce}{\pi \ln(1/u)} m^2 u^{2m}.
 \end{aligned}$$

and for the second term, applying another time Stirling inequality, we get:

$$\begin{aligned}
 \frac{\sqrt{(2k+1)!}}{2^k k!} \frac{\sqrt{(2k+3)!}}{2^{k+1}(k+1)!} u^{2k+1} &\leq \frac{e^{1/2} (2k+1)^{k+3/4} e^{-(k+1/2)}}{\sqrt{2\pi} 2^k k^{k+1/2} e^{-k}} \frac{e^{1/2} (2k+3)^{k+7/4} e^{-(k+3/2)}}{\sqrt{2\pi} 2^{k+1} (k+1)^{k+3/2} e^{-(k+1)}} u^{2k+1} \\
 &\leq \frac{(2k+1)^{k+3/4}}{\sqrt{2\pi} 2^k k^{k+1/2}} \frac{(2k+3)^{k+7/4}}{\sqrt{2\pi} 2^{k+1} (k+1)^{k+3/2}} u^{2k+1} \\
 &= \frac{\sqrt{2} \left(1 + \frac{1}{2k}\right)^{k+3/4} \left(1 + \frac{3}{2k}\right)^{k+7/4}}{\pi \left(1 + \frac{1}{k}\right)^{k+3/2}} \sqrt{k} u^{2k+1} \\
 &\leq \frac{\sqrt{2} \left(1 + \frac{3}{2k}\right)^{2k} \left(1 + \frac{3}{2k}\right)^{5/2}}{\pi \left(1 + \frac{1}{k}\right)^k \left(1 + \frac{1}{k}\right)^{3/2}} \sqrt{k} u^{2k+1} \\
 &\leq \frac{\sqrt{2}}{\pi} \left(1 + \frac{3}{2k}\right)^{2k} \left(1 + \frac{3}{2k}\right)^{5/2} \sqrt{k} u^{2k+1} \\
 &\leq \frac{15e^3}{\pi} \sqrt{k} u^{2k+1}.
 \end{aligned}$$

Hence, as  $\sum_{k \geq m+1} \sqrt{k} u^{2k+1} \leq -\frac{mu^{2m+1}}{\ln u}$ , we have  $|v_m| \leq \frac{30A^2abe^3}{\pi c \ln(1/u)} mu^{2m}$ .

(iv) Let us calculate  $\alpha^\top \text{Diag}(\lambda)^{-1} \alpha$ . We have:

$$\begin{aligned}
 \alpha^\top \text{Diag}(\lambda)^{-1} \alpha &= \sum_{k=0}^m \nu_{2k+1}^2 \lambda_{2k+1}^{-1} \\
 &= A^2 \sqrt{\frac{bu}{2a}} \sum_{k=0}^m \frac{(2k+1)!}{(2^k k!)^2} u^{2k} u^{-(2k+1)} \\
 &= A^2 \sqrt{\frac{b}{2au}} \sum_{k=0}^m \frac{(2k+1)!}{(2^k k!)^2} \\
 &\leq \frac{4A^2 e \sqrt{b}}{\pi \sqrt{2au}} \sum_{k=0}^m \sqrt{k} \\
 &\leq \frac{8A^2 e \sqrt{b}}{\pi \sqrt{2au}} m^{3/2}.
 \end{aligned}$$

(**Final constant.**) By taking  $L = \max \left\{ \frac{4A^2 e}{\pi \ln(1/u)}, \frac{48A^2 ce}{\pi \ln(1/u)}, \frac{60A^2 abe^3}{\pi c \ln(1/u)}, \frac{8A^2 e \sqrt{b}}{\pi \sqrt{2au}} \right\}$ , we have proven the lemma.  $\square$

We can now state the principal result of this section:

**Proposition 11** (Rate of convergence for the bias). *If  $\kappa \leq \min\{a^2, 1/5, u^{1/(3c)}\}$  and such that  $\ln(1/\kappa)\kappa \leq \frac{\ln(1/u)}{2aL}$ , then*

$$\mathcal{P}^{-1} \leq \mathcal{P}_\kappa^{-1} \leq \mathcal{P}^{-1} \left( 1 + \frac{L}{2 \ln^2(1/u)} \kappa \ln^2(1/\kappa) \right). \quad (16)$$

*Proof.* The first inequality  $\mathcal{P}^{-1} \leq \mathcal{P}_\kappa^{-1}$  is obvious. On the other side,

$$\mathcal{P}_\kappa^{-1} = \inf_{\beta} \frac{\beta^\top (M^\top M + \kappa \text{Diag}(\lambda)^{-1}) \beta}{\beta^\top (I - \eta \eta^\top) \beta} \leq \frac{\alpha^\top (M^\top M + \kappa \text{Diag}(\lambda)^{-1}) \alpha}{\alpha^\top (I - \eta \eta^\top) \alpha},$$

With the estimates of Lemma 11, we have for  $mu^{2m} < \frac{1}{4aL}$ :

$$\begin{aligned}
 \mathcal{P}_\kappa^{-1} &\leq \frac{1 + Lm^2 u^{2m} + \kappa L m^{3/2}}{\frac{1}{4a} - Lmu^{2m}} \\
 &\leq \mathcal{P}^{-1} (1 + Lm^2 u^{2m} + \kappa L m^{3/2}).
 \end{aligned}$$

Let us take  $m = \frac{\ln(1/\kappa)}{2 \ln(1/u)}$ . Then

$$\begin{aligned}
 \mathcal{P}_\kappa^{-1} &\leq \mathcal{P}^{-1} \left( 1 + \kappa L \frac{\ln^2(1/\kappa)}{4 \ln^2(1/u)} + \kappa L \frac{\ln^{3/2}(1/\kappa)}{2^{3/2} \ln^{3/2}(1/u)} \right) \\
 &\leq \mathcal{P}^{-1} \left( 1 + \kappa L \frac{\ln^2(1/\kappa)}{2 \ln^2(1/u)} \right),
 \end{aligned}$$

as soon as  $\kappa \leq a^2$ . Note also that the condition  $mu^{2m} < \frac{1}{4aL}$  can be rewritten in terms of  $m$  as  $\kappa \ln(1/\kappa) < \frac{\ln(1/u)}{2aL}$ . The other conditions of Lemma 11 are  $\kappa \leq e^{-3/2} \sim 0.22$  and  $\kappa \leq u^{1/(3c)}$ .  $\square$

#### D.4 Facts about Hermite polynomials

**Orthogonality.** We have:

$$\int_{\mathbb{R}} e^{-x^2} H_k(x) H_m(x) = 2^k k! \sqrt{\pi} \delta_{km}.$$

**Recurrence relations.** We have:

$$H'_i(x) = 2iH_{i-1}(x),$$

and

$$H_{i+1}(x) = 2xH_i(x) - 2iH_{i-1}(x).$$

**Mehler's formula.** We have:

$$\sum_{k=0}^{\infty} \frac{H_k(x)e^{-x^2/2}H_k(y)e^{-y^2/2}}{2^k k! \sqrt{\pi}} u^k = \frac{1}{\sqrt{\pi}} \frac{1}{\sqrt{1-u^2}} \exp\left(\frac{2u}{1+u}xy - \frac{u^2}{1-u^2}(x-y)^2 - \frac{x^2}{2} - \frac{y^2}{2}\right).$$

This implies that the functions  $x \mapsto \frac{1}{\sqrt{\pi}} \frac{1}{\sqrt{1-u^2}} \exp\left(\frac{2u}{1+u}xy - \frac{u^2}{1-u^2}(x-y)^2 - \frac{x^2}{2} - \frac{y^2}{2}\right)$  has coefficients  $\frac{H_k(y)e^{-y^2/2}}{\sqrt{2^k k! \sqrt{\pi}}} u^k$  in the orthonormal basis  $(x \mapsto \frac{H_k(x)e^{-x^2/2}}{\sqrt{2^k k! \sqrt{\pi}}})$  of  $L_2(dx)$ .

Thus

$$\int_{\mathbb{R}} \frac{1}{\sqrt{\pi}} \frac{1}{\sqrt{1-u^2}} \exp\left(\frac{2u}{1+u}xy - \frac{u^2}{1-u^2}(x-y)^2 - \frac{x^2}{2} - \frac{y^2}{2}\right) \frac{H_k(x)e^{-x^2/2}}{\sqrt{2^k k! \sqrt{\pi}}} dx = \frac{H_k(y)e^{-y^2/2}}{\sqrt{2^k k! \sqrt{\pi}}} u^k,$$

that is

$$\int_{\mathbb{R}} \exp\left(\frac{2u}{1+u}xy - \frac{u^2}{1-u^2}(x-y)^2 - x^2\right) H_k(x) dx = \sqrt{\pi} \sqrt{1-u^2} H_k(y) u^k.$$

This implies:

$$\int_{\mathbb{R}} \exp\left(\frac{2u}{1-u^2}xy - \frac{x^2}{1-u^2}\right) H_k(x) dx = \sqrt{\pi} \sqrt{1-u^2} H_k(y) \exp\left(\frac{u^2}{1-u^2}y^2\right) u^k$$

For  $y = 0$ , we get

$$\int_{\mathbb{R}} \exp\left(-\frac{x^2}{1-u^2}\right) H_k(x) dx = \sqrt{\pi} \sqrt{1-u^2} H_k(0) u^k.$$

Another consequence is that

$$\begin{aligned} \sum_{k=0}^{\infty} \frac{H_k(x)H_k(y)}{2^k k! \sqrt{\pi}} u^k &= \frac{1}{\sqrt{\pi}} \frac{1}{\sqrt{1-u^2}} \exp\left(\frac{2u(1-u)+2u^2}{1-u^2}xy - \frac{u^2}{1-u^2}(x^2+y^2)\right) \\ &= \frac{1}{\sqrt{\pi}} \frac{1}{\sqrt{1-u^2}} \exp\left(\frac{2u}{1-u^2}xy - \frac{u}{1-u^2}(x^2+y^2) + \frac{u}{1+u}(x^2+y^2)\right) \\ &= \frac{1}{\sqrt{\pi}} \frac{1}{\sqrt{1-u^2}} \exp\left(-\frac{u}{1-u^2}(x-y)^2\right) \exp\left(\frac{u}{1+u}(x^2+y^2)\right) \\ &= \frac{1}{\sqrt{\pi}} \frac{\sqrt{u}}{\sqrt{1-u^2}} \exp\left(-\frac{u}{1-u^2}(x-y)^2\right) \frac{1}{\sqrt{u}} \exp\left(\frac{u}{1+u}(x^2+y^2)\right). \end{aligned}$$

Thus, when  $u$  tends to 1, as a function of  $x$ , this tends to a Dirac at  $y$  times  $e^{y^2}$ .
